# Supplementary material for: Molecular Aspects of the Interaction with Gram-Negative and Gram-Positive Bacteria of Hydrothermal Carbon Nanoparticles Associated with Bac8c2,5Leu Antimicrobial Peptide
Source: PubMed Central journal article supplement — ACS Omega. 2022 May 5;7(19):16402–13. doi: 10.1021/acsomega.2c00305 (PMC9118266; doi:10.1021/acsomega.2c00305), 2022-05-05
Supplement: ao2c00305_si_001.pdf [file ao2c00305_si_001.pdf]

# **Molecular aspects of the interaction with Gram- and Gram+ bacteria of hydrothermal carbon nanoparticles associated to Bac8c2,5Leu antimicrobial peptide**

Giulia Barzan<sup>1,4#</sup>, Ida Kokalari<sup>2#</sup>, Giacomo Gariglio<sup>2</sup>, Elena Ghibaudi<sup>2</sup>, Marc Devocelle<sup>3</sup>, Marco P. Monopoli<sup>3</sup>, Alessio Sacco<sup>1</sup>, Angelo Greco<sup>1,4</sup>, Andrea M. Giovannozzi<sup>1</sup>, Andrea M. Rossi<sup>1</sup> and Ivana Fenoglio<sup>2\*</sup>

<sup>1</sup> National Institute of Metrological Research (INRiM), 10135, Torino, Italy

<sup>2</sup> Department of Chemistry, University of Torino, 10125, Torino, Italy

<sup>3</sup> Department of Chemistry, Royal College of Surgeons in Ireland (RCSI), Dublin 2, Ireland

<sup>4</sup> Department of Electronics and Telecommunications, Politecnico di Torino, 10129, Torino, Italy

## **SUPPORTING INFORMATION**

**Table S1.** Desorption Indexes (DI) following incubation of SL-Bac8c<sup>2,5Leu</sup>@CNP-S with BSA

|                       | <b>DI values<br/>at pH 7.4</b> | <b>DI values<br/>at pH 4.0</b> |
|-----------------------|--------------------------------|--------------------------------|
| In the absence of BSA | 0.052                          | 0.61                           |
| + Equimolar BSA       | 0.30                           | 0.22                           |
| + Excess BSA          | 0.42                           | 0.18                           |

**Table S2.** Analysis of the logarithmic differences of bacterial viability between all the samples tested and the CTRL- or the unloaded CNP-S at the three concentrations tested for *S. aureus* SH1000. The positive values are referred to bacterial growth while the negative ones to bacterial decrease. *T tests* were performed to determine the statistical significance of the differences between the means of the couple of samples considered. Stars: \* *p value* < 0.05; \*\* *p value* < 0.01.

CNP 53.3 µg/ml    AMP 16 µg/ml

| Time (h) | Samples     |               |                                        |                                        |
|----------|-------------|---------------|----------------------------------------|----------------------------------------|
|          | AMP – CTRL- | CNP-S – CTRL- | Bac8c <sup>2,5</sup> Leu@CNP-S – CTRL- | Bac8c <sup>2,5</sup> Leu@CNP-S - CNP-S |
| 0        | 0,00        | 0,00          | 0,00                                   | 0,00                                   |
| 2        | -0,09       | 0,17          | -0,06                                  | -0,22                                  |
| 5        | -0,15       | ** 0,57       | ** 0,44                                | -0,13                                  |
| 24       | ** -2,57    | ** 1,82       | ** -1,19                               | ** -3,01                               |

CNP 26.7 µg/ml    AMP 8 µg/ml

| Time (h) | Samples     |               |                                        |                                        |
|----------|-------------|---------------|----------------------------------------|----------------------------------------|
|          | AMP – CTRL- | CNP-S – CTRL- | Bac8c <sup>2,5</sup> Leu@CNP-S – CTRL- | Bac8c <sup>2,5</sup> Leu@CNP-S - CNP-S |
| 0        | 0,00        | 0,00          | 0,00                                   | 0,00                                   |
| 2        | -0,30       | 0,18          | -0,06                                  | -0,24                                  |
| 5        | -0,16       | ** 0,60       | ** 0,52                                | -0,09                                  |
| 24       | ** -2,04    | ** 1,76       | -0,03                                  | ** -1,80                               |

CNP 13.3 µg/ml    AMP 4 µg/ml

| Time (h) | Samples     |               |                                        |                                        |
|----------|-------------|---------------|----------------------------------------|----------------------------------------|
|          | AMP – CTRL- | CNP-S – CTRL- | Bac8c <sup>2,5</sup> Leu@CNP-S – CTRL- | Bac8c <sup>2,5</sup> Leu@CNP-S - CNP-S |
| 0        | 0,00        | 0,00          | 0,00                                   | 0,00                                   |
| 2        | 0,18        | 0,11          | ** -0,24                               | -0,35                                  |
| 5        | 0,33        | ** 0,64       | * 0,27                                 | -0,37                                  |
| 24       | ** -0,69    | ** 1,41       | 0,00                                   | ** -1,41                               |

**Table S3.** Analysis of the logarithmic differences of bacterial viability between all the samples tested and the CTRL- or the unloaded CNP-S at the three concentrations tested for *E. coli* MG1655. The positive values are referred to bacterial growth while the negative ones to bacterial decrease. *T tests* were performed to determine the statistical significance of the differences between the means of the couple of samples considered. Stars: \* *p value* < 0.05; \*\* *p value* < 0.01.

CNP 53.3 µg/ml    AMP 16 µg/ml

| Time (h) | Samples     |               |                                        |                                        |
|----------|-------------|---------------|----------------------------------------|----------------------------------------|
|          | AMP – CTRL- | CNP-S – CTRL- | Bac8c <sup>2,5Leu</sup> @CNP-S – CTRL- | Bac8c <sup>2,5Leu</sup> @CNP-S - CNP-S |
| 0.25     | 0,00        | 0,00          | 0,00                                   | 0,00                                   |
| 2        | ** -5,36    | ** -0,45      | ** -0,38                               | 0,07                                   |
| 5        | ** -5,98    | -0,07         | ** -0,87                               | ** -0,80                               |
| 24       | ** -6,49    | 0,15          | 0,04                                   | -0,11                                  |

CNP 26.7 µg/ml    AMP 8 µg/ml

| Time (h) | Samples     |               |                                        |                                        |
|----------|-------------|---------------|----------------------------------------|----------------------------------------|
|          | AMP – CTRL- | CNP-S – CTRL- | Bac8c <sup>2,5Leu</sup> @CNP-S – CTRL- | Bac8c <sup>2,5Leu</sup> @CNP-S - CNP-S |
| 0.25     | 0,00        | 0,00          | 0,00                                   | 0,00                                   |
| 2        | ** -3,03    | ** -0,33      | ** -0,32                               | 0,01                                   |
| 5        | ** -5,98    | -0,11         | ** -0,82                               | ** -0,71                               |
| 24       | ** -6,49    | 0,06          | -0,05                                  | -0,11                                  |

CNP 13.3 µg/ml    AMP 4 µg/ml

| Time (h) | Samples     |               |                                        |                                        |
|----------|-------------|---------------|----------------------------------------|----------------------------------------|
|          | AMP – CTRL- | CNP-S – CTRL- | Bac8c <sup>2,5Leu</sup> @CNP-S – CTRL- | Bac8c <sup>2,5Leu</sup> @CNP-S - CNP-S |
| 0.25     | 0,00        | 0,00          | 0,00                                   | 0,00                                   |
| 2        | * -0,91     | -0,02         | -0,13                                  | -0,11                                  |
| 5        | ** -1,99    | -0,07         | ** -0,51                               | ** -0,45                               |
| 24       | ** -2,72    | 0,13          | -0,08                                  | -0,21                                  |

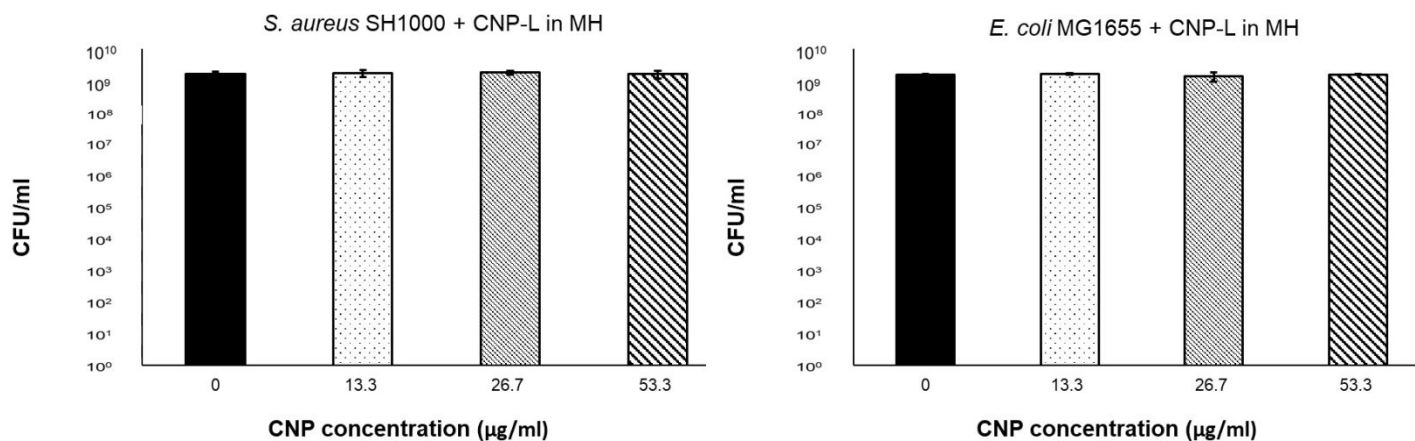

**Figure S1. Viability assay of *S. aureus* SH1000 and *E. coli* MG1655 treated with CNPs at three concentrations.** Counted CFU/ml of bacteria grown in MH only as negative control (CTRL -), or in presence of CNPs at concentrations of: 13.3 µg/ml, 26.7 µg/ml and 53.3 µg/ml for 24 h. Each experiment was replicated three independent times.

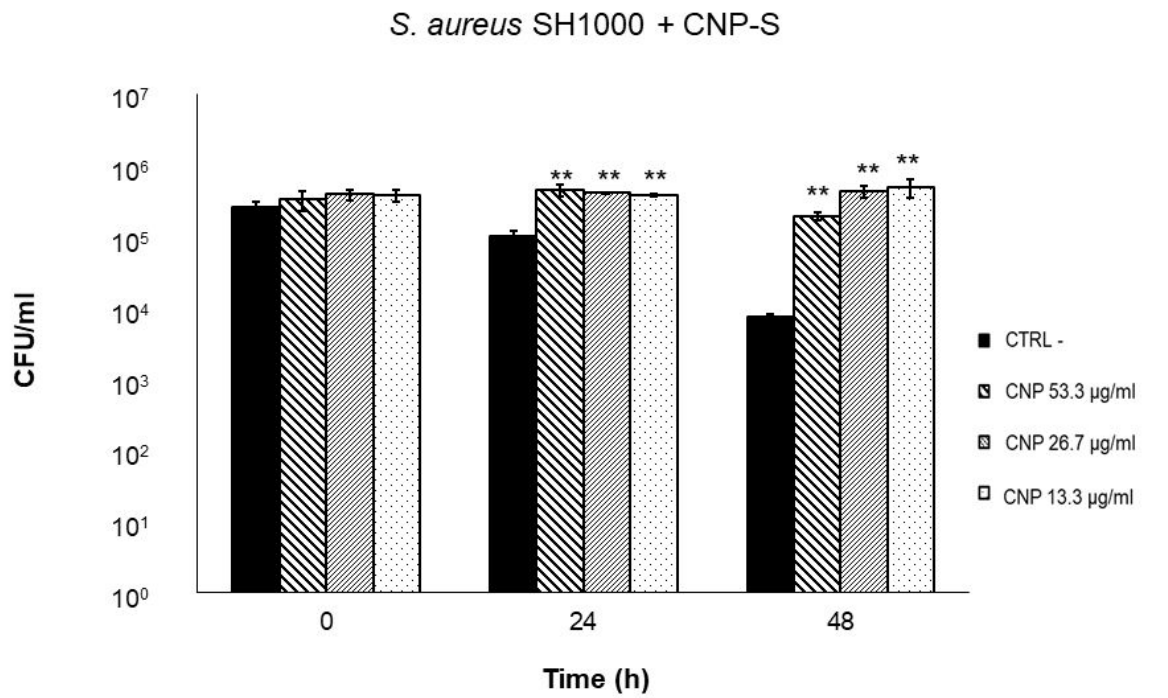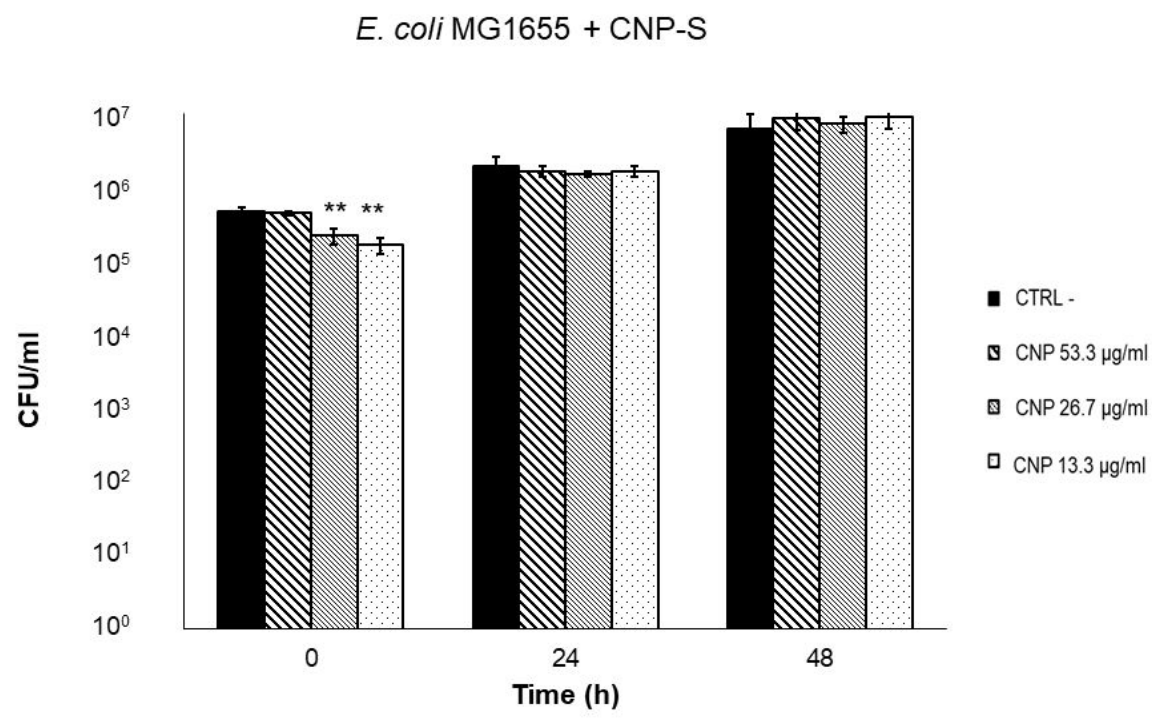

**Figure S2. Effect of CNP-S on the vitality of *S. aureus* SH1000 and *E. coli* MG1655.** Bacteria were grown in PBS (black, CTRL -), or in presence of CNP-S at concentrations of: 53.3 µg/ml, 26.7 µg/ml and 13.3 µg/ml. Each experiment was replicated three independent times. The double stars represent a *p* value < 0.01.

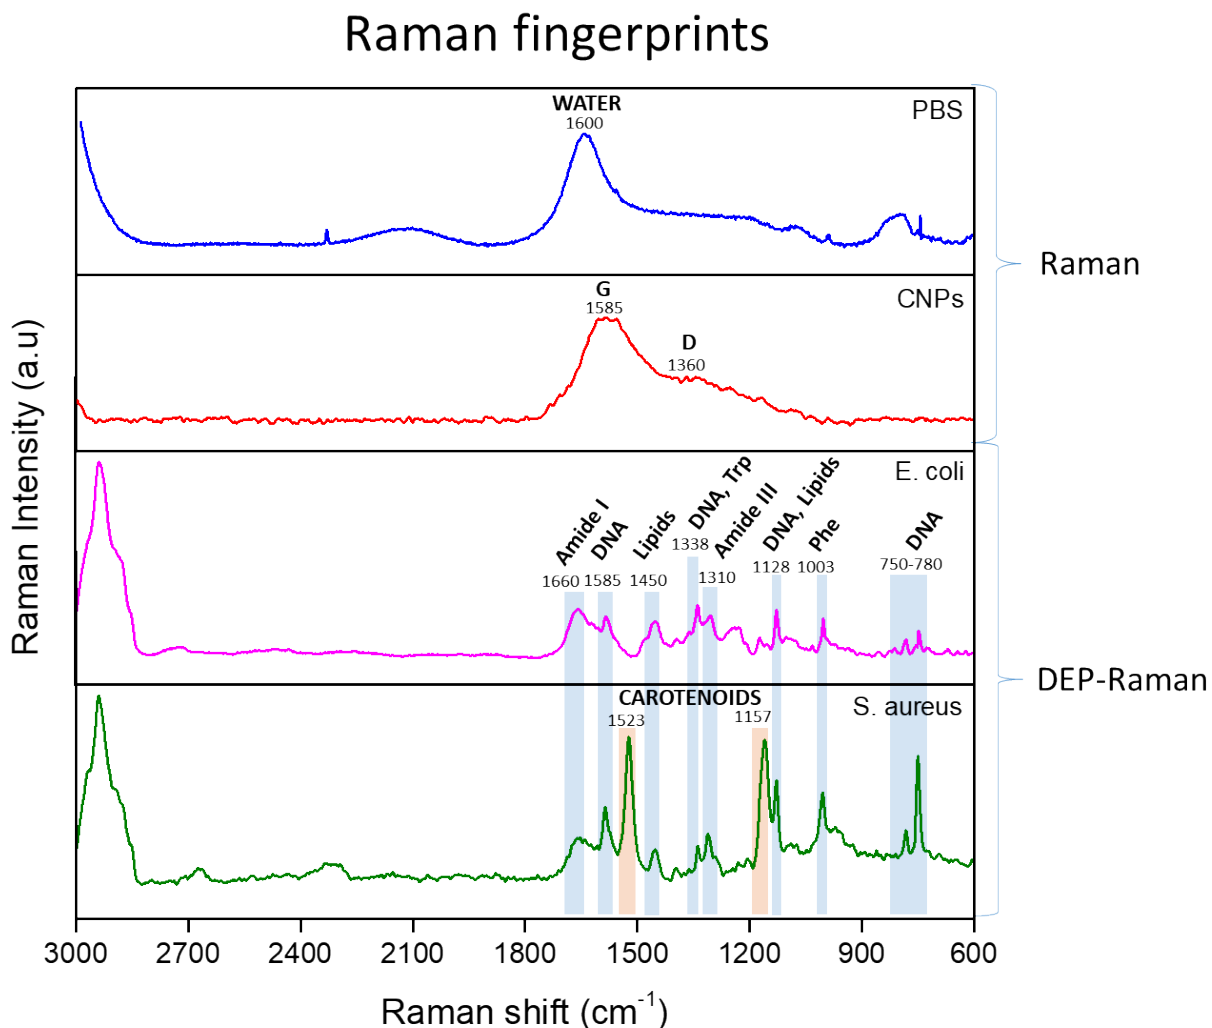

**Figure S3.** Raman spectra of phosphate buffered saline solution (PBS); CNPs; *E. coli* MG1655 and *S. aureus* SH1000.

In the spectra of PBS the vibrational band of water  $1600\text{ cm}^{-1}$  is the dominant signal. CNP-L exhibited the typical G and D bands of the turbostratic graphite ( $1585\text{ cm}^{-1}$  and  $1360\text{ cm}^{-1}$ ) [13] The bands were broad, and with a low G/D intensity ratio, indicating a preponderant amorphous carbon atomic structure.

The Raman spectra of bacteria showed the typical signals referred to bacterial cells structure but the two strains were clearly different also for the very visible carotenoid signals present in the *S. aureus* spectrum.

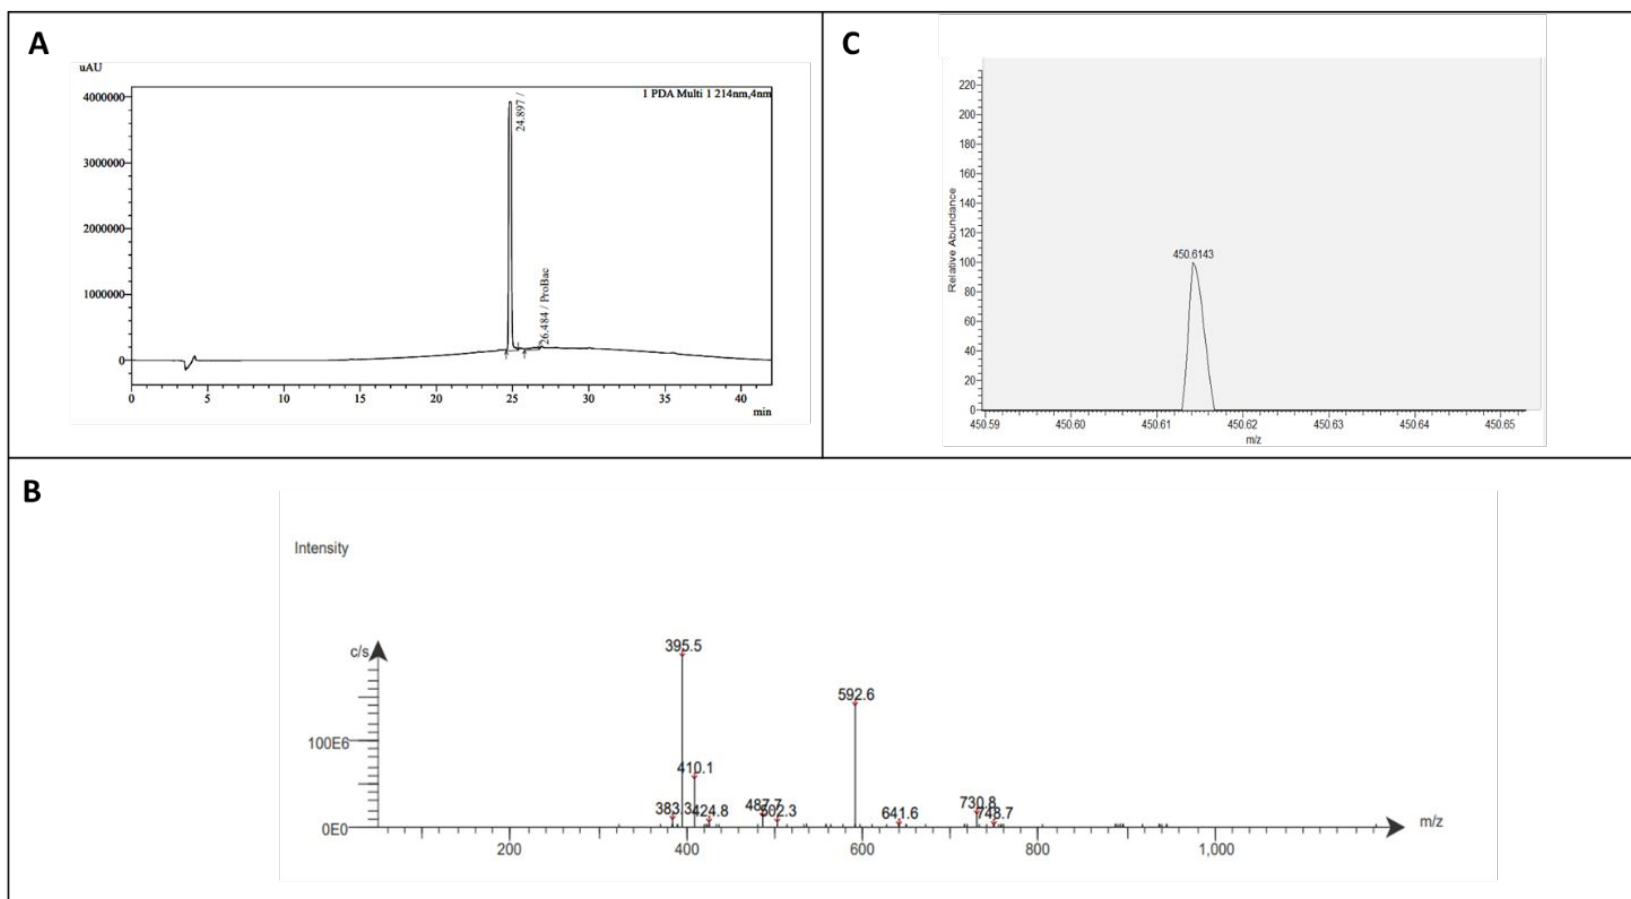

**Figure S4.** (A) Chromatogram of purified Bac8c<sup>2,5</sup>Leu, obtained by RP-HPLC, PDA detector with a wavelength of 214 nm. (B) Mass spectra of Bac8c<sup>2,5</sup>Leu Formula: C<sub>57</sub>H<sub>90</sub>N<sub>20</sub>O<sub>8</sub>, [Bac8c<sup>2,5</sup>Leu +2H]<sup>2+</sup> Calculated MW: 592.6, Measured MW: 592.6; [Bac8c<sup>2,5</sup>Leu +3H]<sup>3+</sup> Calculated MW: 395.5, Measured MW:395.5. (C) MS analysis of peptide SL- Bac8c<sup>2,5</sup>Leu. Formula C<sub>66</sub>H<sub>105</sub>N<sub>21</sub>O<sub>10</sub>, [Bac8c-SL+3H]<sup>3+</sup> Calculated MW: 450.6, Measured MW: 450.6



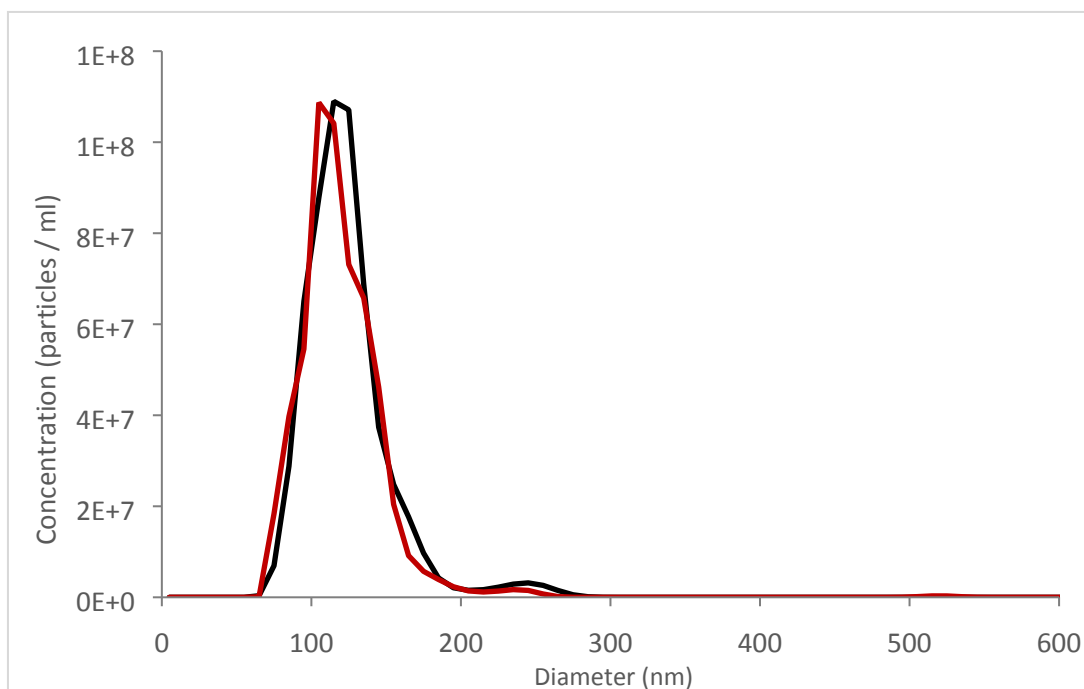

|      | <b>CNP</b> | <b>Bac8c<sup>2,5</sup>Leu@CNP</b> |
|------|------------|-----------------------------------|
| Mean | 123,8      | 119,8                             |
| Mode | 119,2      | 109,2                             |
| SD   | 29,4       | 30,8                              |
| D10  | 83,5       | 79,5                              |
| D50  | 109,6      | 105,7                             |
| D90  | 146,5      | 138,8                             |

**Figure S5.** Size distribution of Bac8c<sub>2,5</sub>Leu@CNP-S and CNP-S evaluated by Nanoparticle Track Analysis.

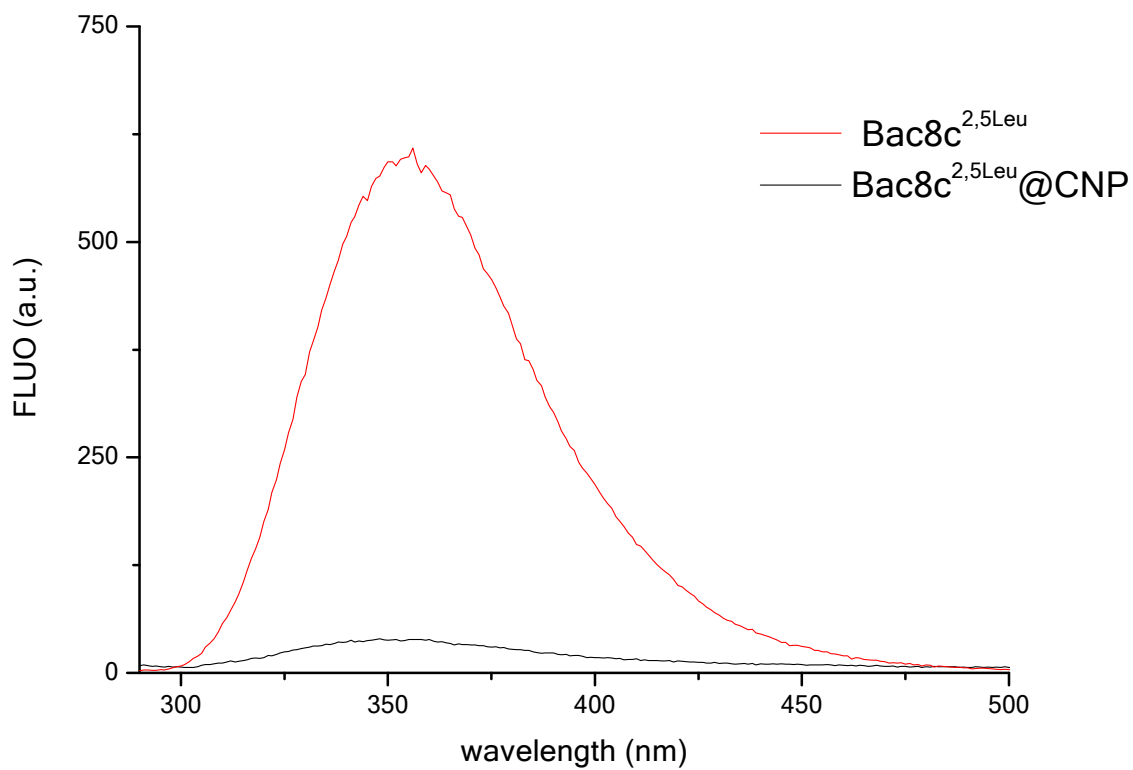

**Figure S6. Loading of CNP-S with  $\text{Bac8c}^{2,5\text{Leu}}$  peptide.** Fluorescence spectra of the supernatant obtained after incubation of the peptide with CNP and removal of the nanoparticles  $\text{Bac8c}^{2,5\text{Leu}}@CNP$  by centrifugation (black line) in comparison with the spectra of the loading solution (red line).

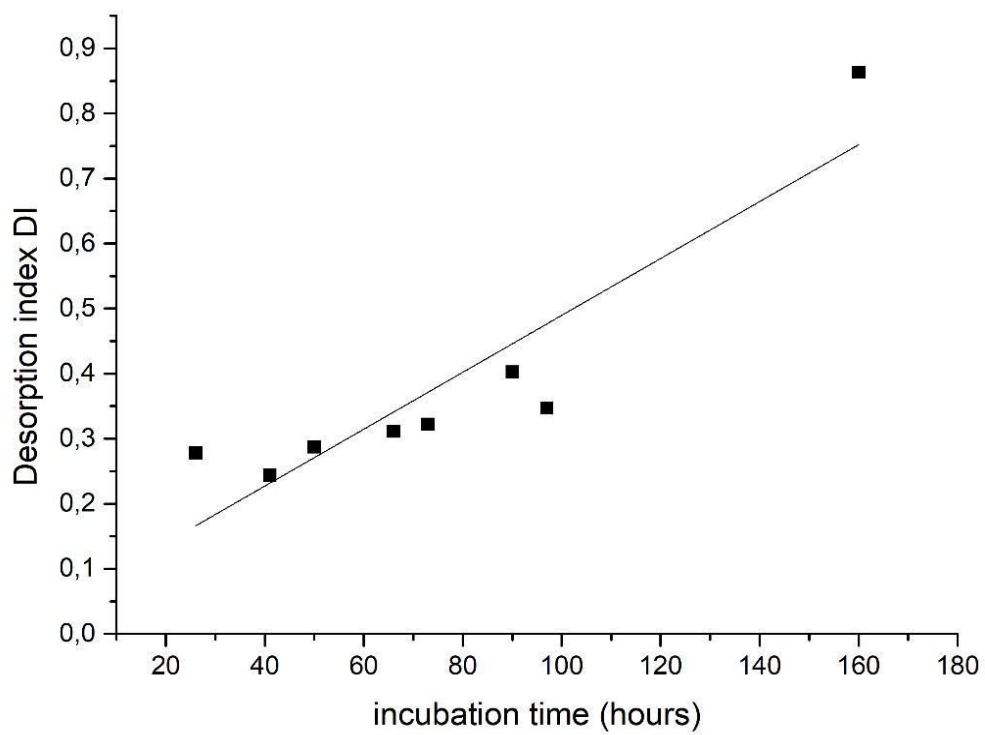

**Figure S7.** Desorption kinetic of SL-Bac8c<sup>2,5Leu</sup>@CNP monitored by EPR spectroscopy at pH 7.4.

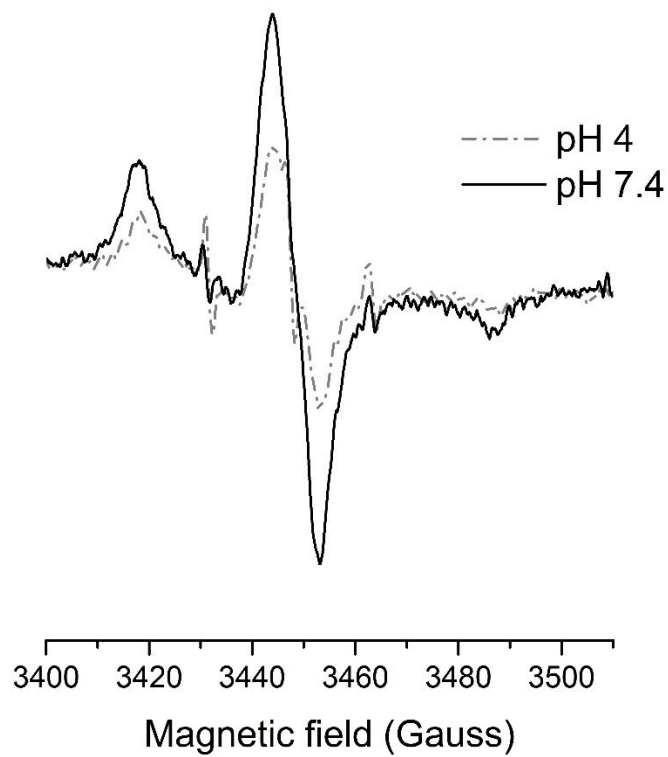

**Figure S8. Effect of pH on peptide desorption from SL-Bac8c<sup>2,5</sup>Leu@CNP-S.** EPR spectra of SL-Bac8c<sup>2,5</sup>Leu@CNP suspension in 10 mM phosphate buffer at neutral and acidic pH (Instrumental settings: microwave power 5 mW; modulation amplitude 1 G; flat cell at RT)

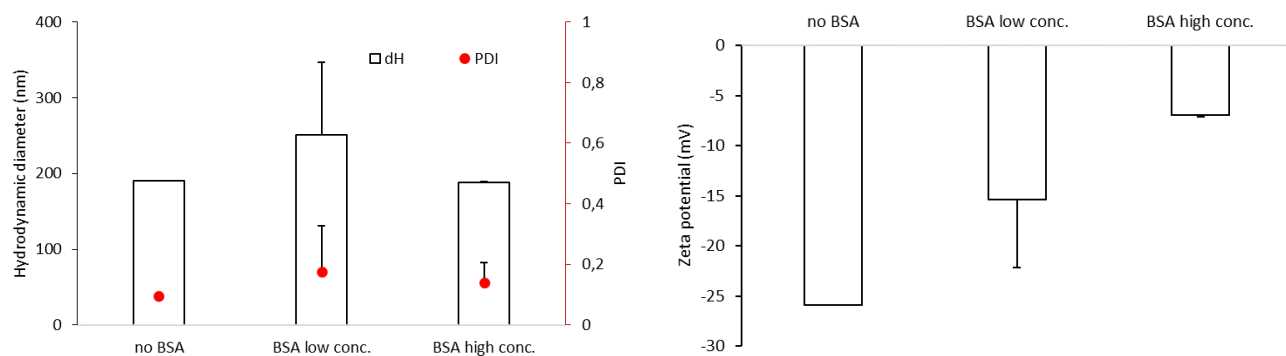

**Figure S9.** Effect of BSA on the hydrodynamic diameter (A) and  $\zeta$ -potential (B) of  $\text{Bac8c}^{2,5\text{Leu}}@\text{CNP}$
